1 **Outbreak of invasive wound mucormycosis in a burn unit due to multiple strains**  
2 **of *Mucor circinelloides* f. *circinelloides* resolved by whole genome sequencing**

3

4 Dea Garcia-Hermoso<sup>a,b,\*</sup>, Alexis Criscuolo<sup>c,\*</sup>, Soo Chan Lee<sup>d</sup>, Matthieu Legrand<sup>e,f</sup>, Marc  
5 Chaouat<sup>f,g</sup>, Blandine Denis<sup>h</sup>, Matthieu Lafaurie<sup>h</sup>, Martine Rouveau<sup>i</sup>, Charles Soler<sup>j</sup>, Jean-  
6 Vivien Schaal<sup>k</sup>, Maurice Mimoun<sup>f,g</sup>, Alexandre Mebazaa<sup>e,f</sup>, Joseph Heitman<sup>l</sup>, Françoise  
7 Dromer<sup>a,b</sup>, Sylvain Brisse<sup>m</sup>, Stéphane Bretagne<sup>a,b,f,n</sup>, Alexandre Alanio<sup>a,b,f,n</sup>

8

9 <sup>a</sup> Institut Pasteur, Unité de Mycologie Moléculaire, Centre National de Référence  
10 Mycoses Invasives et Antifongiques (CNRMA)

11 <sup>b</sup> CNRS URA3012

12 <sup>c</sup> Institut Pasteur – Bioinformatics and Biostatistics Hub – C3BI, USR 3756 IP CNRS –  
13 Paris, France

14 <sup>d</sup> South Texas Center for Emerging Infectious Diseases (STCEID), Department of Biology,  
15 The University of Texas at San Antonio, Texas, USA

16 <sup>e</sup> UMR 942, INSERM; Service d'Anesthésie-Réanimation ; AP-HP, Groupe Hospitalier  
17 Saint-Louis-Lariboisière-Fernand-Widal, Paris France

18 <sup>f</sup> Université Paris Diderot, Sorbonne Paris Cité, Paris, France

19 <sup>g</sup> Service de chirurgie plastique, reconstructrice, esthétique et traitement chirurgical des  
20 brûlés

21 <sup>h</sup> Service de Maladies Infectieuses et Tropicales ; AP-HP, Groupe Hospitalier Saint-Louis-  
22 Lariboisière-Fernand-Widal, Paris France

23 <sup>i</sup> Laboratoire de Microbiologie, Hôpital Saint-Louis, Groupe Hospitalier Lariboisière,  
24 Saint-Louis, Fernand Widal, Assistance Publique-Hôpitaux de Paris (AP-HP)

25 <sup>j</sup> Service de Biologie médicale, Hôpital d'instruction des Armées, Clamart, France

26 <sup>k</sup> Centre de traitement des brûlés, Hôpital d'instruction des Armées, Clamart, France

27 <sup>l</sup> Molecular Genetics and Microbiology, Duke University Medical Center, Durham, North  
28 Carolina, USA

29 <sup>m</sup> Institut Pasteur, Biodiversity and epidemiology of bacterial pathogens, Paris, France

30 <sup>n</sup> Laboratoire de Parasitologie-Mycologie, Hôpital Saint-Louis, Groupe Hospitalier  
31 Lariboisière, Saint-Louis, Fernand Widal, Assistance Publique-Hôpitaux de Paris (AP-  
32 HP)

33

34 \*These authors participated equally to this work

35

36

37 Alexandre Alanio, Molecular Mycology unit, Institut Pasteur, 25 rue du Dr Roux 75724  
38 Paris Cedex 15; email: alexandre.alanio@pasteur.fr; Tel: +33140613255; Fax:  
39 +33145688420

40 **Abstract**

41 *Mucorales* are ubiquitous environmental molds responsible for mucormycosis in  
42 diabetic, immunocompromised, and severely burned patients. Small outbreaks of  
43 invasive wound mucormycosis (IWM) have already been reported in burn units without  
44 extensive microbiological investigations. We faced an outbreak of IWM in our center and  
45 investigated the clinical isolates with whole genome sequencing (WGS) analysis.

46 We analyzed *M. circinelloides* isolates from patients in our burn unit (BU1) together with  
47 non-outbreak isolates from burn unit 2 (BU2, Paris area) and from France over a two-  
48 year period (2013-2015). For each isolate, WGS and a *de novo* genome assembly was  
49 performed from read data extracted from the aligned contig sequences of the reference  
50 genome (1006PhL).

51 A total of 21 isolates were sequenced including 14 isolates from six BU1 patients.  
52 Phylogenetic classification showed that the clinical isolates clustered in four highly  
53 divergent clades. Clade1 contained at least one of the strains from the six  
54 epidemiologically-linked BU1 patients. The clinical isolates seemed specific to each  
55 patient. Two patients were infected with more than two strains from different clades  
56 suggesting that an environmental reservoir of clonally unrelated isolates was the source  
57 of contamination. Only two patients shared one strain in BU1, suggesting direct  
58 transmission or contamination with the same environmental source.

59 WGS coupled with precise epidemiological data and analysis of several isolates per  
60 patients revealed in our study a complex situation with both potential cross-  
61 transmission and multiple contaminations with a heterogeneous pool of strains from a  
62 cryptic environmental reservoir.

63

64

65 **Importance**

66 Invasive wound mucormycosis (IWM) is a severe infection due to the environmental  
67 molds belonging to the order Mucorales. Severely burned patients are particularly at  
68 risk for IWM. Here, we used Whole Genome Sequencing (WGS) analysis to resolve an  
69 outbreak of IWM due to *Mucor circinelloides* that occurred in our hospital (BU1). We  
70 sequenced 21 clinical isolates, including 14 from BU1 and 7 unrelated isolates, and  
71 compared them to the reference genome (1006PhL). This analysis revealed that the  
72 outbreak was mainly due to multiple strains that seemed patient-specific, suggesting  
73 that the patients were more likely infected from a pool of diverse strains from the  
74 environment rather than from direct transmission between the patients. This study  
75 revealed the complexity of a *Mucorales* outbreak in the settings of IWM in burn patients,  
76 which has been highlighted based on whole genome sequencing and careful sampling.

## 77 **Introduction**

78 Mucormycosis is a rare and life-threatening infection caused by *Mucorales* belonging to  
79 the subphylum *Mucoromycotina* (1). These molds are ubiquitously distributed in the  
80 environment and mostly disseminated through airborne spores, which can be  
81 considered as infective propagules responsible mainly for respiratory (lung and  
82 sinuses), wound, and skin infections (2).

83 Patients at risk for mucormycosis are immunocompromised (hematological  
84 malignancies, hematopoietic stem cell transplantation, solid organ transplant, steroid  
85 therapy), or have diabetes mellitus, deferoxamine treatment, trauma or severe burns (2-  
86 4). Among skin-related infections, contaminated materials (Elastoplast bandages, tape,  
87 tongue depressors, ostomy bags, linens) have been implicated as the cause of local or  
88 disseminated infections in patients with various underlying diseases (5). Specifically, in  
89 burn patients, invasive wound mucormycosis (IWM) has been reported in both small  
90 series (6) and epidemiological surveys (7-10).

91 Over the past 10 years, outbreaks of mucormycosis have been increasingly reported in  
92 various environments. Indeed, outbreaks in animals including chickens, sheep and frogs  
93 have been described (11-13). In humans, outbreak cases in the hospital before 2008  
94 were reviewed by Antoniadou in 2009 (14). The author found 12 reported outbreaks  
95 and two pseudoepidemics of cases since 1977. Outbreaks of mucormycosis have been  
96 reported in the USA, UK and Europe (14). Since 2008, outbreaks or clustered cases have  
97 been reported after the tornadoes in Joplin, Missouri (13 patients) (15, 16), in the ICU in  
98 France (three patients) (17), in adults (six patients) (18) or infants (five patients) (19)  
99 exposed to contaminated linens in the US, in infants in Egypt (five patients) (20), and in  
100 patients undergoing arthroscopy in Argentina (40 patients) (21). More specifically, in a  
101 Belgian burn unit, Christiaens *et al.* described an outbreak of *Lichtheimia corymbifera*

102 associated with non-sterile elastoplast bandage contamination in seven burn patients  
103 including five with infection and two with colonization (22). In this study, the authors  
104 did not have evidence for the genotypic relatedness of the strains between patients and  
105 material strains. In addition, a large outbreak due to yogurt contamination in the US  
106 responsible for digestive symptoms (nausea, cramps, vomiting, and diarrhea) in about  
107 300 individuals has been described recently (23). In this study, phylogenetic analysis  
108 and whole genome sequence (WGS) analysis yielded new information on the genetic  
109 structure of *Mucor circinelloides* species complex, which may include 3 related but  
110 distinct species currently recognized as *Mucor circinelloides f. circinelloides*, *lusitanicus*,  
111 and *griseocyanus* (23, 24).

112 Between 2013 to 2015, we faced an outbreak of proven IWM due to *M. circinelloides f.*  
113 *circinelloides* in a burn unit (BU) in the Saint-Louis Hospital (SLS), Paris, France  
114 involving six patients raising the hypothesis of a common source of contamination. Over  
115 the same period of time, 4 additional cases that occurred in a burn unit (BU2) of another  
116 hospital (PER, Clamart, France) in the Paris suburb were notified the National Reference  
117 Center for Invasive Mycoses and Antifungals (NRCMA).

118 Our aim was to clarify the origin/source of infection in both BU1 and BU2. In the  
119 absence of genotyping markers for this organism, WGS analysis was performed on 21  
120 isolates (14 from the outbreaks and 7 unrelated) to investigate the links between clinical  
121 isolates, understand the epidemiology of the outbreak, and identify and eliminate the  
122 source of the infections.

123

## 124 RESULTS

### 125 Clinical and microbiological investigation

126 Three patients (P03, P04, P05) developed proven IWM due to *M. circinelloides* f.  
127 *circinelloides* within 18 days in BU1 (between August 18th and September 5<sup>th</sup>, 2014),  
128 and subsequently died from these infections (Table 1). The outbreak was suspected  
129 when a positive culture was observed in P04 (11 days after the first positive sample in  
130 P03). Sequential samples from the wounds were prospectively obtained starting with  
131 P03. A few months later (114 days), another patient (P06) developed proven IWM and  
132 *M. circinelloides* f. *circinelloides* was also involved (Fig. 1). We retrospectively noticed  
133 that isolates from the same species have already been identified in 2013 from two  
134 patients on BU1 (P01 with no infection, and P02 with proven IWM). A total of six  
135 patients were exposed (P01, P07) and/or infected with this species (P02 to P06) in BU1,  
136 with P01 as the putative index case. Infection control measures were implemented  
137 locally to avoid potential nosocomial transmission to other patients of the unit. More  
138 than 30 environmental samples were cultured. All were negative. DNA amplified with  
139 the Mucor/Rhizopus PCR test (25) was detected only in the Bair Hugger filters that were  
140 used during the hospitalization of P03, P04 and P05.

141 To prevent transmission to other patients, we needed to investigate whether these  
142 strains were clonal, and needed unrelated isolates from other geographical areas. The  
143 additional cases corresponded to an outbreak in BU2 (PER) involving four patients with  
144 IWM, as well as one case of proven invasive mucormycosis with kidney invasion in a  
145 transplant recipient in STR that was notified to the NRCMA.

146 Overall, the 12 patients (21 clinical isolates) included 10 cases identified in two burn  
147 units (Table 1, Fig. 1).

148

## 149 **Phylogenetic analyses of three loci**

150 ITS, D1/D2, and RPB1 sequences were analyzed as separate (data not shown) and  
151 combined datasets. The topology of the multi-locus dataset with 3 methods (NJ, ML and  
152 Bayesian inference) was comparable between the individual trees of the three genes  
153 analyzed. Four clades (Fig. 2), respectively denoted C1 (14 isolates including 11 from  
154 BU1), C2 (four including two from BU1), C3 (two strains in addition to the reference  
155 strain including one from BU1) and C4 (one isolate) were identified from the analysis of  
156 the combined dataset that yielded a significant support ( $\geq 95\%$  bootstrap for NJ and ML;  
157 1.0 for Bayesian inference). Isolates recovered from BU1 were distributed in three  
158 clades (C2, C3, C4). All patients from BU1 had at least one isolate included in C1.

159

## 160 **Whole genome analysis**

161 To better resolve the diversity of the strains within the four clades, and because no  
162 further genotyping methods existed for this organism, whole genome sequencing was  
163 performed. Because the biology and the genetics of this organism is poorly understood,  
164 we first checked the reproducibility of the sequencing process and the stability of the  
165 genome, to be able to define genetically-identical strains.

166

### 167 *Establishing the genetic threshold to determine genetically-identical strains*

168 For the three strains isolated from single spore colonies (i.e. P05\_600\_BU1\_SLS,  
169 P04\_603\_BU1\_SLS and P03\_594\_BU1\_SLS), the pairwise evolutionary distance was  
170 estimated between *de novo* assemblies of the parental and the single spore colony (i.e.  
171 0.00035, 0.00044 and 0.00029, respectively). This information gave us the expected  
172 distances between pairs of genomes arising from identical strains and independently  
173 sequenced distinct isolates. The largest of the three distances (i.e. 0.00044) was



174 therefore selected as a cutoff below which two compared isolate genomes were defined  
175 as arising from the same strain.

176

177 *Experimental investigation of the potential genetic drift of M. circinelloides f. circinelloides*

178 Experimental investigation of the 1006PhL genome upon iterative sub-culturing on agar  
179 (n=3) and three passages in mice (n=3) revealed no acquisition of SNPs during this  
180 process, suggesting that the genome of *M. circinelloides f. circinelloides* was stable upon  
181 iterative passages.

182

183 *Whole genome phylogenetic classification of the 21 clinical isolates*

184 A phylogenetic classification of the whole genome of the 21 isolates was then performed  
185 (Fig. 3). This phylogenetic tree allows classification of the genomes in four main clades  
186 corresponding exactly to the same clades (C1 to C4) described based on the analysis of  
187 three loci (Fig. 2). Clades C2, C3, and C4 contained isolates that are clearly distinct from  
188 those inside clade C1, e.g. estimated pairwise evolutionary distances between isolates  
189 from C1 and those inside C2, C3, and C4 are 0.0187, 0.0385, and 0.0390 on average,  
190 respectively, whereas C1 pairwise intra-distance is 0.0014 on average.

191 Furthermore, increased resolution of WGS allowed to robustly identify strains and  
192 understand which clinical isolates belong to which strain. Indeed, the 21 investigated  
193 isolates and the reference 1006PhL could be partitioned into 14 distinct strains (S1 to  
194 S14; Fig. 3, Table 1).

195

## 196 **Outbreak dynamics**

197 In BU1, the isolate of the potential index case P01 (P01\_617\_BU1\_SLS, S12) was different  
198 from the isolates subsequently recovered in BU1. The isolate from P02, corresponding to

199 the specific strain S5 clustered in C1 together with isolates from P03, P04, P05, and P06.  
200 P03 and P06 were also infected with two isolates from S1 (#594 and #592) and S6  
201 (#032 and #023), respectively. P04 was infected over 10 days with two strains S9 and  
202 S7 belonging to C2 (isolates #601 and #559) and C1 (isolates #602 and #603),  
203 respectively. P05 was infected over 11 days with isolates belonging to three strains from  
204 C1, S8 (isolates #598 and #600) and S3 (#622) and S1 (#599). Indeed, P04 and P05 had  
205 mixed infections during the course of their disease, suggesting initial contamination  
206 with a mixture of strains, this latter strain also recovered in P03. This suggests cross  
207 contamination or common infection in P3 and P5. This have also been observed in BU2,  
208 where two patients (P09 and P10) shared the strain S2 (#703 and #704) that clustered  
209 in C1. Two patients (P11 and P08) were also infected with strains that belong to C2 and  
210 C3, respectively. The environmental (#615) and the colonization (#621) isolates from  
211 our hospital clustered in C2 and C4 respectively. The patient from Eastern France  
212 clustered in C1 (S4) but with a specific and different strain than the other C1 strains, as  
213 expected for a geographically unrelated infection.

214 **DISCUSSION**

215 Because isolation of Mucorales is rare in the hospital, the observation of the same  
216 species in two independent samples/patients has long been considered as a sufficient  
217 criterion to suspect and assess transmission or common contamination. Here, we  
218 investigated further outbreak-related and -unrelated isolates based on WGS analysis. To  
219 our knowledge, this is the first time WGS analysis has been utilized to resolve an  
220 outbreak of invasive *Mucorales* infection in the context of nosocomial acquisition.

221 Because WGS was applied for the first time in this setting, we first sought to evaluate  
222 reproducibility of the sequencing process and intra-culture variation/stability during in  
223 vivo passage. As the genome of three selected strains was sequenced and assembled  
224 twice, we were able to compare contig sets belonging *a priori* to the same strain. This  
225 method led to the definition of a pairwise distance cutoff. Therefore, if two genome  
226 sequences belonging to different isolates have a pairwise distance below this cutoff, it  
227 was inferred *a posteriori* that the two isolates corresponded to the same strain. This cut-  
228 off should vary as a function of the organism, the method of sequencing, the  
229 bioinformatics pipeline and the pathophysiology of the disease, reinforcing that such  
230 data should be obtained each time an investigation of an outbreak due to rare organisms  
231 is undertaken.

232 Of note, using pairwise evolutionary distances could be considered as a fast but accurate  
233 alternative to the well-known Average Nucleotide Identity (ANI) approach to compare  
234 genomes (26, 27) because both were shown to be linearly correlated (28).

235 Contrary to the initial hypothesis of a single strain transmission in BU1, we observed  
236 that all of the patients from the BU1 outbreak (P01 to P06) were infected by different  
237 strains. Surprisingly, our data revealed that each strain was patient-specific in BU1,  
238 except for S1, suggesting that the outbreak in BU1 was due to multiple strains present in

239 and acquired from a local environmental “reservoir” containing clonally unrelated  
240 isolates. This hypothesis is reinforced by two patients (P04 and P05) with IWM co-  
241 infected by more than 2 genetically distinct strains. Another hypothesis is that the  
242 patients could have been exposed to specific strains or a mixture of strains before  
243 arriving in BU1. However, a delay between admission and the first positive culture was  
244 16 days (median), making the hypothesis that exposure occurred in the environment of  
245 BU1 more likely. In the settings of severe burns where invasive fungi do sporulate on the  
246 wounds, transmission by air or by the hands of healthcare workers to other patients are  
247 both possible. A major point to emphasize is that only two patients from BU1 (P03 and  
248 P05) shared the same strain S1. This feature has also been observed in BU2 suggesting  
249 that transmission between patients is possible. However, this does not rule out the  
250 hypothesis of a contamination by the same strain from the environment.

251 Environmental investigation of the outbreak in BU1 failed to identify the source of  
252 infection using culture of multiple samples from the environment, as well as by PCR.  
253 DNA amplified with the *Mucor/Rhizopus* PCR (25) was detected only in the Bair Hugger  
254 filters that were used during the hospitalization of the IWM patients P03, P04 and P05.  
255 Despite the negative result of this investigation, it is likely that the contamination came  
256 from a local source because this has already been described with linens or 12lastoplast  
257 in burn units (5, 18, 19).

258 Our findings about the genetic structure of *M. circinelloides* f. *circinelloides* are  
259 reminiscent of the WGS investigations of the *Apophysomyces spp.* outbreak in Joplin (16),  
260 or of the *S. clavata* outbreak in France (29), which revealed that several genetic groups  
261 can be responsible for infections over the same period of time. In our case, in a given  
262 restricted area (BU1), we identified a large diversity of isolates responsible for IWM and  
263 were not able to find isolates belonging to unique strains recovered in different places.

264 At the other end of this spectrum, for *Apophysomyces trapeziformis* several genetically-  
265 identical isolates were recovered in different places at a distance of several miles (16).  
266 In the case of *E. rostratum*, all outbreak isolates have closely-related genomes suggesting  
267 that a unique strain was responsible for the outbreak (30). These differences could be  
268 explained by a completely different pathophysiology of the disease and mode of fungal  
269 transmission between these fungal organisms.

270 This outbreak is illustrative of the importance of the sampling strategy. Repeated  
271 sampling is paramount, as is avoiding the assumption that one patient should harbor  
272 only one strain. Indeed, in our case two patients were infected by mixtures of strains  
273 concomitantly, as already described for cryptococcosis (31). Mixed infections and the  
274 impact of genetic heterogeneity of isolates from single patients on the interpretation of  
275 transmission chains is an emerging theme in molecular epidemiology in the genomic era  
276 (32). Our investigation fully supports the view that multisampling is critical to decipher  
277 transmission patterns, especially in the context of outbreaks with such long timeframes.  
278 Here, multiple sampling was only performed prospectively for four patients (P03, P04,  
279 P05 and P06) with one isolate stored and studied for all of the remaining patients. The  
280 proportion of mixed infection may thus have been higher than detected here if all of the  
281 isolates from all of the patients had been investigated. This work suggests that  
282 guidelines for sampling in future *Mucorales* outbreaks should be implemented.

283 Our management of this outbreak led to the implementation of a twice weekly screening  
284 of serum samples from patients hospitalized in BU1 using *Mucorales* PCR, and by  
285 immediate prescription of antifungal treatment when the PCR test was positive (25) in  
286 addition to isolation of all culture- and/or PCR-positive patient and dedicated nurses to  
287 prevent the risk of transmission to other patients. So far, with 2-years of hindsight, no  
288 additional case of *M. circinelloides* f. *circinelloides* IWM has been observed. This

289 illustrates how hygiene prevention together with early diagnosis of mucormycosis may  
290 improve patient management and avoid dramatic outbreaks in hospital settings among  
291 populations at risk.

## 292 MATERIALS AND METHODS

### 293 *Isolates and patients*

294 An outbreak of *M. circinelloides* f. *circinelloides* infections was suspected in the Saint-  
295 Louis Hospital (SLS) located in Paris that involved six patients (P01 to P06) from BU1  
296 between March 2013 and January 2015. The outbreak was not suspected until *M.*  
297 *circinelloides* was recovered from wounds of patient P04. Five of the six patients had  
298 proven IWM using a modified version of the EORTC/MSG criteria (25, 33) and one was  
299 considered colonized and was not treated.

300 In order to study the genetic relatedness between the BU1 clinical isolates, additional  
301 isolates identified as *M. circinelloides* from other sources were selected (Table 1): (i)  
302 sequential isolates from 4 of the patients prospectively collected from the skin lesions as  
303 previously described (25); (ii) isolates collected in SLS but in another ward (one from  
304 the environment, and another one colonizing a patient); (iii) isolates (n=4) recovered in  
305 another outbreak that involved 4 patients hospitalized in another burn unit (BU2) in the  
306 'Hopital d'instruction des Armées', Clamart, located in the suburb of Paris (PER) over the  
307 same period of time. These isolates have been sent to the French National Reference  
308 Center for Invasive Mycoses & Antifungals (NRCMA); (iv) one isolate from invasive  
309 mucormycosis recovered from the kidney biopsy of a kidney transplant recipient in  
310 Strasbourg in the Eastern part of France (STR).

311 All positive slants were sub-cultured once on Sabouraud dextrose agar with gentamycin  
312 and chloramphenicol (Bio-Rad, Marnes-la-coquette, France) at 30°C using the bulk and  
313 never single colonies.

314 Overall, 21 isolates were selected for further analysis: 15 clinical isolates from BU1  
315 (SLS) (12 bulk cultures including 1 from colonization), 1 environmental isolate from SLS,  
316 4 clinical isolates from BU2 (PER), and 1 clinical isolate from STR.

317 The sequence of *Mucor circinelloides* 1006PhL strain was used as the reference genome  
318 (34).

319

### 320 ***Environmental investigation in BU1***

321 Extensive environmental sampling was performed and mycological contamination was  
322 investigated by culture methods on Sabouraud agar (Bio-Rad, Marnes-la-coquette,  
323 France) and 2% Malt extract incubated at 30°C and 37°C. Overall, 30 specimens from  
324 non-sterile material, air, surfaces, and aeration machineries, technical room, Bair Hugger  
325 machines, and dedicated non-sterile material were tested. Bair Hugger machine allows  
326 to actively warm the patient. It pulses warm air through a plastic pipe into a blanket  
327 applied on the patient.

328

### 329 ***Polyphasic identification of isolates***

330 The 21 isolates were sent to the NRCMA, where the purity was verified and  
331 identification to the species-level performed using phenotypic and molecular  
332 identification. In details, microscopic examination was performed on 5 to 7 day old  
333 cultures growth on 2% malt agar at 30°C. Amplification and sequencing of the ITS1-5.8S-  
334 ITS2 region and the D1/D2 region of the LSU rDNA were performed as described  
335 previously (35). The amplification of the RPB1 gene (RNA polymerase II largest subunit)  
336 was made with primers RPB1Ac and RPB1Cr (36). The PCR products were then  
337 sequenced and the consensus sequences were obtained as already described (35).  
338 Sequences were subjected to pairwise alignments against curated fungal reference  
339 databases available at the on-line MycoBank database (<http://www.mycobank.org/>).

340

### 341 ***Sequence alignment and phylogenetic analysis***



342 *Mucor circinelloides* is a single species consisting of four different formae (f.  
343 *circinelloides*; f. *griseocyanus*; f. *janssenii*; and f. *lusitanicus*), with formae *circinelloides* the  
344 most commonly involved in human mucormycosis (24). Multilocus sequence alignments  
345 on partial sequences of 3 different loci (ITS, 28S and RPB1) was performed (35, 37).  
346 The sequences were aligned using MAFFT v.7.308 with default settings. Data from each  
347 gene was analyzed separately and combined as a concatenated 3-locus dataset. For the  
348 multilocus dataset, Neighbor-joining (NJ) phylogenetic trees were constructed using  
349 MEGA6 software (38) with Tamura 3-parameter substitution model and 1000 bootstrap  
350 replicates. The program PhyML v3.0.1 (39) was used to infer maximum likelihood (ML)  
351 phylogeny using TN93 substitution model and 1000 bootstrap repetitions. Bayesian  
352 analysis with default prior of MrBayes v.3.2 (40) was conducted to determine posterior  
353 probabilities. Two analyses were done by running 10<sup>6</sup> generations in four chains,  
354 sampling every 100 generations.

355

### 356 ***Whole genome sequencing and assembly***

357 Because genotyping methods for *M. circinelloides* f. *circinelloides* were lacking, WGS was  
358 performed to compare isolates. Libraries were constructed using a Nextera XT DNA  
359 sample preparation kit (Illumina) and sequenced with an Illumina NextSeq 500  
360 sequencing system with a 2x150-nucleotide paired-end protocol. Two lanes from these  
361 tagged libraries resulted in ~12.6 million read pairs per strain on average.

362 All sequenced reads were clipped and trimmed with AlienTrimmer v.0.4.0 (41),  
363 corrected with Musket v.1.1 (42), merged (if needed) with FLASH v.1.2.11 (43), and  
364 subjected to a digital normalization procedure with khmer v.2.0 (44). For each sample,  
365 processed reads were finally assembled with SPAdes v.3.10 (45).

366

367 ***Whole genome analysis***

368 For each pair of assembled genomes, an evolutionary distance (proportion of aligned  
369 nucleotide differences) was estimated with Mash v.1.0.2 (sketch size = 100,000) (28)  
370 The resulting distance matrix was used to infer a Minimum Evolution phylogenetic tree  
371 with FastME v.2.1.5 (46, 47).

372

373 ***Reproducibility of the sequencing process***

374 In a specific experiment dedicated to determine the reproducibility of all the sequencing  
375 process (from extraction to sequence analysis), additional single spore isolation was  
376 performed on malt extract agar 2% plates for 3 isolates recovered from patients P03,  
377 P04 and P05 in BU1 (P05\_600\_BU1\_SLS, P04\_603\_BU1\_SLS, and P03\_594\_BU1\_SLS, see  
378 Table 1). One colony was thus selected from each isolate for additional sequencing.

379

380 ***Genome stability experiments***

381 Genome stability during vegetative growths and host infections was analyzed with  
382 1006PhL strain. In brief, the strain was grown on PDA for one day. The colony was  
383 streaked to isolate a single colony, which then transferred onto a new PDA. After four  
384 days of incubation at 30°C under the light, the spores were collected and subjected to  
385 the same procedures up to three passages (VEG1, VEG2 and VEG3 isolates).

386 For infection passages, spores were suspended in sterile PBS. Male 8 weeks-old BALB/c  
387 mice were infected with  $10^6$  spores in 200  $\mu$ L of sterile PBS via tail vein injection. At day  
388 3 post-inoculation, the mice were sacrificed, their brain collected and placed onto PDA  
389 after brain homogeneization. After one day of incubation, the fungal colony emerging  
390 from the brain was streaked to isolate single colonies. One colony was transferred onto  
391 PDA and incubated at 30°C under light for four days. Spores were then used as inoculum

392 for the next infection passage, up to three passages (INF1, INF2, and INF3 isolates).  
393 Genomic DNAs of these isolates were used to construct libraries, 180-bases fragments  
394 and 2 to 3 kb jumps, which were sequenced by an Illumina HiSeq 2000 platform at the  
395 University of North Carolina High-throughput Sequencing Facility (HTSF).

396

### 397 ***Ethics Statement***

398 The murine infection experiment was conducted at the Duke University Medical Center  
399 in full compliance with all of the guidelines of the Duke University Medical Center  
400 Institutional Animal Care and Use Committee (IACUC) and in full compliance with the  
401 United States Animal Welfare Act (Public Law 98–198). The Duke University Medical  
402 Center IACUC approved all of the vertebrate animal studies under protocol number  
403 A061-12-03. The studies were conducted in the Division of Laboratory Animal  
404 Resources (DLAR) facilities that are accredited by the Association for Assessment and  
405 Accreditation of Laboratory Animal Care (AAALAC).

406

407

408 **FUNDING INFORMATION**

409 This study has been supported by Institut Pasteur and Santé Publique France. JH is  
410 supported by NIH/NIAID R37 MERIT Award AI39115-20, NIH/NIAID R01 Award  
411 AI050113-13, and Astellas Award CRES-15G01.

412

413 **ACKNOWLEDGMENTS**

414 We thank Vincent Enouf from the P2M (Plateforme de microbiology mutualisée), Institut  
415 Pasteur, Paris for supervising and organizing the sequencing of the *M. circinelloides* f.  
416 *circinelloides* isolates.

417

418 **Figure legends**

419 **Fig. 1**

420 Epidemiological map of thirteen patients whose isolates were selected in our study.  
421 Isolates from several geographic areas in France (from dark to light gray) have been  
422 studied: burn unit 1 of Hospital 1, Paris France; wards of SLS, Paris, France; Burn unit 2  
423 of PER in Paris area, France and eastern France (one isolate from STR). Isolates were  
424 prospectively collected for patients P03 to P06. Analyzed isolates are depicted in dark  
425 open circles. Index case of burn unit 1 (full line arrow) was thought to be P01 and  
426 outbreak have been recognized after P04 got infected (dashed arrow)

427

428 **Fig. 2**

429 PhyML tree constructed Maximum Likelihood tree inferred from concatenated 3 loci  
430 dataset (ITS, 28S, and RPB1). Bootstrap support values from PhyML greater than 70%  
431 (left) and Bayesian posterior probability >0.80 (right) are shown at the nodes. The 21  
432 clinical isolates are grouped in clades C1 to C4. The scale bar indicates 0.001 nucleotide  
433 substitutions per character.

434

435

436 **Fig. 3**

437 Minimum Evolution phylogenetic tree of the whole genome of 21 clinical isolates and  
438 the 1006PhL reference strain. The 21 isolates are grouped in different strains clustered  
439 in clades C1 to C4. Clinical isolates belonging to the same strain are highlighted in light  
440 grey. The scale bar indicates 0.04 nucleotide substitutions per character.

441

## 442 References

- 443 1. **Hibbett DS, Binder M, Bischoff JF, Blackwell M, Cannon PF, Eriksson OE,**  
444 **Huhndorf S, James T, Kirk PM, Lücking R, Thorsten Lumbsch H, Lutzoni F,**  
445 **Matheny PB, Mclaughlin DJ, Powell MJ, Redhead S, Schoch CL, Spatafora JW,**  
446 **Stalpers JA, Vilgalys R, Aime MC, Aptroot A, Bauer R, Begerow D, Benny GL,**  
447 **Castlebury LA, Crous PW, Dai Y-C, Gams W, Geiser DM, Griffith GW, Gueidan**  
448 **C, Hawksworth DL, Hestmark G, Hosaka K, Humber RA, Hyde KD, Ironside JE,**  
449 **Köljalg U, Kurtzman CP, Larsson K-H, Lichtwardt R, Longcore J, Miadlikowska**  
450 **J, Miller A, Moncalvo J-M, Mozley-Standridge S, Oberwinkler F, Parmasto E,**  
451 **Reeb V, Rogers JD, Roux C, Ryvarden L, Sampaio JP, Schüssler A, Sugiyama J,**  
452 **Thorn RG, Tibell L, Untereiner WA, Walker C, Wang Z, Weir A, Weiss M, White**  
453 **MM, Winka K, Yao Y-J, Zhang N.** 2007. A higher-level phylogenetic classification  
454 of the Fungi. *Mycological Research* **111**:509–547.
- 455 2. **Roden MM, Zaoutis TE, Buchanan WL, Knudsen TA, Sarkisova TA, Schaufele**  
456 **RL, Sein M, Sein T, Chiou CC, Chu JH, Kontoyiannis DP, Walsh TJ.** 2005.  
457 Epidemiology and outcome of zygomycosis: a review of 929 reported cases. *Clin*  
458 *Infect Dis* **41**:634–653.
- 459 3. **Petrikkos G, Skiada A, Lortholary O, Roilides E, Walsh TJ, Kontoyiannis DP.**  
460 2012. Epidemiology and clinical manifestations of mucormycosis. *Clin Infect Dis*  
461 **54**:S23–S34.
- 462 4. **Lanternier F, Dannaoui E, Morizot G, Elie C, Garcia-Hermoso D, Huerre M,**  
463 **Bitar D, Dromer F, Lortholary O, the French Mycosis Study Group.** 2012. A  
464 global analysis of mucormycosis in france: the RetroZygo Study (2005-2007). *Clin*  
465 *Infect Dis* **54**:S35–S43.
- 466 5. **Rammaert B, lanternier F, Zahar JR, Dannaoui E, Bougnoux ME, Lecuit M,**  
467 **Lortholary O.** 2012. Healthcare-associated mucormycosis. *Clin Infect Dis* **54**:S44–  
468 S54.
- 469 6. **Rabin ER, Lundberg GD, Mitchell ET.** 1961. Mucormycosis in severely burned  
470 patients. Report of two cases with extensive destruction of the face and nasal  
471 cavity. *N Engl J Med* **264**:1286–1289.
- 472 7. **Church D, Elsayed S, Reid O, Winston B, Lindsay R.** 2006. Burn wound  
473 infections. *Clin Microbiol Rev* **19**:403–434.
- 474 8. **Schaal J-V, Leclerc T, Pasquier P, Bargues L.** 2012. Epidemiology of fungal  
475 infection in burns: therapeutic implications. *Burns* **38**:942–3.
- 476 9. **Skiada A, Pagano L, Groll A, Zimmerli S, Dupont B, Lagrou K, Lass-Florl C,**  
477 **Bouza E, Klimko N, Gaustad P, Richardson M, Hamal P, Akova M, Meis JF,**  
478 **Rodriguez-Tudela JL, Roilides E, Mitrousia-Ziouva A, Petrikkos G, European**  
479 **Confederation of Medical Mycology Working Group on Zygomycosis.** 2011.  
480 Zygomycosis in Europe: analysis of 230 cases accrued by the registry of the  
481 European Confederation of Medical Mycology (ECMM) Working Group on  
482 Zygomycosis between 2005 and 2007. *Clin Microbiol Infect* **17**:1859–1867.

- 483 10. **Becker WK, Cioffi WG, McManus AT, Kim SH, McManus WF, Mason AD, Pruitt**  
484 **BA.** 1991. Fungal burn wound infection. A 10-year experience. *Arch Surg* **126**:44–  
485 48.
- 486 11. **Creeper JH, Main DC, Berger L, Huntress S, Boardman W.** 1998. An outbreak of  
487 mucormycosis in slender tree frogs (*Litoria adelensis*) and white-lipped tree frogs  
488 (*Litoria infrafrenata*). *Aust Vet J* **76**:761–762.
- 489 12. **Amano H, Kajio N, Tsujioka T, Mizoguchi T.** 1988. An outbreak of pulmonary  
490 mucormycosis in broiler chickens with *Absidia corymbifera* *J Jap Vet Med Assoc.*  
491 **41**:255–258.
- 492 13. **Riet-Correa F, Dantas AFM, Azevedo EO, Simões SDV, Silva SMS, Vilela R,**  
493 **Mendoza L.** 2008. Outbreaks of rhinofacial and rhinopharyngeal zygomycosis in  
494 sheep in Paraíba, northeastern Brazil. *Pesquisa Veterinária Brasileira* **28**:29–35.
- 495 14. **Antoniadou A.** 2009. Outbreaks of zygomycosis in hospitals. *Clin Microbiol Infect*  
496 **15**:55–59.
- 497 15. **Neblett Fanfair R, Benedict K, Bos J, Bennett SD, Lo Y-C, Adebajo T, Etienne**  
498 **K, Deak E, Derado G, Shieh W-J, Drew C, Zaki S, Sugerman D, Gade L,**  
499 **Thompson EH, Sutton DA, Engelthaler DM, Schupp JM, Brandt ME, Harris JR,**  
500 **Lockhart SR, Turabelidze G, Park BJ.** 2012. Necrotizing cutaneous  
501 mucormycosis after a tornado in Joplin, Missouri, in 2011. *N Engl J Med*  
502 **367**:2214–2225.
- 503 16. **Etienne KA, Gillece J, Hilsabeck R, Schupp JM, Colman R, Lockhart SR, Gade L,**  
504 **Thompson EH, Sutton DA, Neblett Fanfair R, Park BJ, Turabelidze G, Keim P,**  
505 **Brandt ME, Deak E, Engelthaler DM.** 2012. Whole genome sequence typing to  
506 investigate the *Apophysomyces* outbreak following a tornado in Joplin, Missouri,  
507 2011. *PLoS One* **7**:e49989.
- 508 17. **Poirier P, Nourrisson C, Gibold L, Chalus E, Guelon D, Descamp S, Traore O,**  
509 **Cambon M, Aumeran C.** 2013. Three cases of cutaneous mucormycosis with  
510 *Lichtheimia* spp. (ex *Absidia/Mycocladius*) in ICU. Possible cross-transmission in an  
511 intensive care unit between 2 cases. *J Mycol Med* **23**:265–269.
- 512 18. **Cheng VCC, Chen JHK, Wong SCY, Leung SSM, So SYC, Lung DC, Lee W-M,**  
513 **Trendell-Smith NJ, Chan W-M, Ng D, To L, Lie AKW, Yuen K-Y.** 2016. Hospital  
514 Outbreak of pulmonary and cutaneous zygomycosis due to contaminated linen  
515 items from substandard laundry. *Clin Infect Dis* **62**:714–721.
- 516 19. **Duffy J, Harris J, Gade L, Schulster L, Newhouse E, O'Connell H, Noble-Wang J,**  
517 **Rao C, Balajee SA, Chiller T.** 2014. Mucormycosis outbreak associated with  
518 hospital linens. *Pediatr Infect Dis J* **33**:472–476.
- 519 20. **El-Mahallawy HA, Khedr R, Taha H, Shalaby L, Mostafa A.** 2016. Investigation  
520 and management of a *Rhizomucor* outbreak in a pediatric cancer hospital in Egypt.  
521 *Pediatr Blood Cancer* **63**:171–173.
- 522 21. **Chaves MS, Franco D, Nanni JC, Basaldúa ML, Boleas M, Aphalo G, Feltes Silva**

- 523 **P, Elgadban MC, Emery F, Gamarra S, Garcia-Effron G, Bantar C.** 2016. Control  
524 of an outbreak of postoperative bone mucormycosis: An intervention study of  
525 contiguous cohorts. *Am J Infect Control* **44**:1715–1717.
- 526 22. **Christiaens G, Hayette MP, Jacquemin D, Melin P, Mutsers J, De Mol P.** 2005.  
527 An outbreak of *Absidia corymbifera* infection associated with bandage  
528 contamination in a burns unit. *J Hosp Infect* **61**:88.
- 529 23. **Lee SC, Billmyre RB, Li A, Carson S, Sykes SM, Huh EY, Mieczkowski P, Ko DC,**  
530 **Cuomo CA, Heitman J.** 2014. Analysis of a food-borne fungal pathogen outbreak:  
531 virulence and genome of a *Mucor circinelloides* isolate from yogurt. *mBio*  
532 **5**:e01390–14.
- 533 24. **Walther G, Pawłowska J, Alastruey-Izquierdo A, Wrzosek M, Rodriguez-**  
534 **Tudela JL, Dolatabadi S, Chakrabarti A, de Hoog GS.** 2013. DNA barcoding in  
535 Mucorales: an inventory of biodiversity. *Persoonia* **30**:11–47.
- 536 25. **Legrand M, Gits-Muselli M, Boutin L, Garcia-Hermoso D, Maurel V, Soussi S,**  
537 **Benyamina M, Ferry A, Chaussard M, Hamane S, Denis B, Touratier S, Guigue**  
538 **N, Frealle E, Jeanne M, Shaal J-V, Soler C, Mimoun M, Chaouat M, Lafaurie M,**  
539 **Mebazaa A, Bretagne S, Alanio A.** 2016. Detection of circulating mucorales dna  
540 in critically ill burn patients: preliminary report of a screening strategy for early  
541 diagnosis and treatment. *Clin Infect Dis* **63**:1312–1317.
- 542 26. **Goris J, Konstantinidis KT, Klappenbach JA, Coenye T, Vandamme P, Tiedje**  
543 **JM.** 2007. DNA-DNA hybridization values and their relationship to whole-genome  
544 sequence similarities. *Intern J Syst Evol Microbiol* **57**:81–91.
- 545 27. **Wibberg D, Rupp O, Blom J, Jelonek L, Kröber M, Verwaaijen B, Goesmann A,**  
546 **Albaum S, Grosch R, Pühler A, Schlüter A.** 2015. Development of a *Rhizoctonia*  
547 *solani* AG1-IB specific gene model enables comparative genome analyses between  
548 phytopathogenic *R. solani* AG1-IA, AG1-IB, AG3 and AG8 Isolates. *PLoS One*  
549 **10**:e0144769.
- 550 28. **Ondov BD, Treangen TJ, Melsted P, Mallonee AB, Bergman NH, Koren S,**  
551 **Phillippy AM.** 2016. Mash: fast genome and metagenome distance estimation  
552 using MinHash. *Genome Biol* **17**:132.
- 553 29. **Vaux S, Criscuolo A, Desnos-Ollivier M, Diancourt L, Tarnaud C,**  
554 **Vandenbogaert M, Brisse S, Coignard B, Dromer F, Geotrichum Investigation**  
555 **Group.** 2014. Multicenter outbreak of infections by *Saprochaete clavata*, an  
556 unrecognized opportunistic fungal pathogen. *mBio* **5**:e02309–14.
- 557 30. **Litvintseva AP, Hurst S, Gade L, Frace MA, Hilsabeck R, Schupp JM, Gillece JD,**  
558 **Roe C, Smith D, Keim P, Lockhart SR, Changayil S, Weil MR, MacCannell DR,**  
559 **Brandt ME, Engelthaler DM.** 2014. Whole-genome analysis of *Exserohilum*  
560 *rostratum* from an outbreak of fungal meningitis and other infections. *J Clin*  
561 *Microbiol* **52**:3216–3222.
- 562 31. **Desnos-Ollivier M, Patel S, Spaulding AR, Charlier C, Garcia-Hermoso D,**  
563 **Nielsen K, Dromer F.** 2010. Mixed infections and in vivo evolution in the human



- 564 fungal pathogen *Cryptococcus neoformans*. mBio **1**:e00091–10–e00091–10.
- 565 32. **Didelot X, Fraser C, Gardy J, Colijn C.** 2017. Genomic infectious disease  
566 epidemiology in partially sampled and ongoing outbreaks. Mol Biol Evol **y**:997–  
567 1007.
- 568 33. **de Pauw B, Walsh TJ, Donnelly JP, Stevens DA, Edwards JE, Calandra T,  
569 Pappas PG, Maertens J, Lortholary O, Kauffman CA, Denning DW, Patterson  
570 TF, Maschmeyer G, Bille J, Dismukes WE, Herbrecht R, Hope WW, Kibbler CC,  
571 Kullberg BJ, Marr KA, Muñoz P, Odds FC, Perfect JR, Restrepo A, Ruhnke M,  
572 Segal BH, Sobel JD, Sorrell TC, Viscoli C, Wingard JR, Zaoutis T, Bennett JE,  
573 Group E, Group N.** 2008. Revised definitions of invasive fungal disease from the  
574 European Organization for Research and Treatment of Cancer/Invasive Fungal  
575 Infections Cooperative Group and the National Institute of Allergy and Infectious  
576 Diseases Mycoses Study Group (EORTC/MSG) Consensus Group. Clin Infect Dis  
577 **46**:1813–1821.
- 578 34. **Findley K, Oh J, Yang J, Conlan S, Deming C, Meyer JA, Schoenfeld D, Nomicos  
579 E, Park M, NIH Intramural Sequencing Center Comparative Sequencing  
580 Program, Becker J, Benjamin B, Blakesley R, Bouffard G, Brooks S, Coleman  
581 H, Dekhtyar M, Gregory M, Guan X, Gupta J, Han J, Hargrove A, Ho S-L, Johnson  
582 T, Legaspi R, Lovett S, Maduro Q, Masiello C, Maskeri B, McDowell J,  
583 Montemayor C, Mullikin J, Riebow N, Schandler K, Schmidt B, Sison C,  
584 Stantripop M, Thomas J, Thomas P, Vemulapalli M, Young A, Kong HH, Segre  
585 JA.** 2013. Topographic diversity of fungal and bacterial communities in human  
586 skin. Nature **498**:367–370
- 587 35. **Garcia-Hermoso D, Hoinard D, Gantier J-C, Grenouillet F, Dromer F, Dannaoui  
588 E.** 2009. Molecular and phenotypic evaluation of *Lichtheimia corymbifera*  
589 (formerly *Absidia corymbifera*) complex isolates associated with human  
590 mucormycosis: rehabilitation of *L. ramosa*. J Clin Microbiol **47**:3862–3870.
- 591 36. **Stiller JW, Hall BD.** 1997. The origin of red algae: implications for plastid  
592 evolution. Proc Natl Acad Sci USA **94**:4520–4525.
- 593 37. **Alvarez E, Sutton DA, Cano J, Fothergill AW, Stchigel A, Rinaldi MG, Guarro J.**  
594 2009. Spectrum of zygomycete species identified in clinically significant  
595 specimens in the United States. J Clin Microbiol **47**:1650–1656.
- 596 38. **Tamura K, Stecher G, Peterson D, Filipinski A, Kumar S.** 2013. MEGA6: molecular  
597 evolutionary genetics analysis version 6.0. Mol Biol Evol **30**:2725–2729.
- 598 39. **Guindon S, Gascuel O.** 2003. A simple, fast, and accurate algorithm to estimate  
599 large phylogenies by maximum likelihood. Syst Biol **52**:696–704.
- 600 40. **Ronquist F.** 2004. Bayesian inference of character evolution. Trends Ecol Evol  
601 (Amst) **19**:475–481.
- 602 41. **Criscuolo A, Brisse S.** 2013. AlienTrimmer: a tool to quickly and accurately trim  
603 off multiple short contaminant sequences from high-throughput sequencing  
604 reads. Genomics **102**:500–506.

- 605 42. **Liu Y, Schröder J, Schmidt B.** 2013. Musket: a multistage k-mer spectrum-based  
606 error corrector for Illumina sequence data. *Bioinformatics* (Oxford, England)  
607 **29**:308–315.
- 608 43. **Magoč T, Salzberg SL.** 2011. FLASH: fast length adjustment of short reads to  
609 improve genome assemblies. *Bioinformatics* (Oxford, England) **27**:2957–2963.
- 610 44. **Crusoe MR, Alameldin HF, Awad S, Boucher E, Caldwell A, Cartwright R,**  
611 **Charbonneau A, Constantinides B, Edverson G, Fay S, Fenton J, Fenzl T, Fish J,**  
612 **Garcia-Gutierrez L, Garland P, Gluck J, González I, Guermont S, Guo J, Gupta**  
613 **A, Herr JR, Howe A, Hyer A, Härpfer A, Irber L, Kidd R, Lin D, Lippi J, Mansour**  
614 **T, McA'Nulty P, McDonald E, Mizzi J, Murray KD, Nahum JR, Nanlohy K,**  
615 **Nederbragt AJ, Ortiz-Zuazaga H, Ory J, Pell J, Pepe-Ranney C, Russ ZN,**  
616 **Schwarz E, Scott C, Seaman J, Sievert S, Simpson J, Skennerton CT, Spencer J,**  
617 **Srinivasan R, Standage D, Stapleton JA, Steinman SR, Stein J, Taylor B,**  
618 **Trimble W, Wiencko HL, Wright M, Wyss B, Zhang Q, Zyme E, Brown CT.** 2015.  
619 The khmer software package: enabling efficient nucleotide sequence analysis.  
620 *F1000Res* **4**:900.
- 621 45. **Bankevich A, Nurk S, Antipov D, Gurevich AA, Dvorkin M, Kulikov AS, Lesin**  
622 **VM, Nikolenko SI, Pham S, Prjibelski AD, Pyshkin AV, Sirotkin AV, Vyahhi N,**  
623 **Tesler G, Alekseyev MA, Pevzner PA.** 2012. SPAdes: a new genome assembly  
624 algorithm and its applications to single-cell sequencing. *J Comput Biol* **19**:455–  
625 477.
- 626 46. **Desper R, Gascuel O.** 2002. Fast and accurate phylogeny reconstruction  
627 algorithms based on the minimum-evolution principle. *J Comput Biol* **9**:687–705.
- 628 47. **Lefort V, Desper R, Gascuel O.** 2015. FastME 2.0: A comprehensive, accurate, and  
629 fast distance-based phylogeny inference program. *Mol Biol Evol* **32**:2798–2800.
- 630

bioRxiv preprint doi: <https://doi.org/10.1101/225049>; this version posted December 12, 2017. The copyright holder for this preprint (which was not certified by peer review) is the author/funder, who has granted bioRxiv a license to display the preprint in perpetuity. It is made available under aCC-BY-NC 4.0 International license.

Patient number

P13  
P12  
P11  
P10  
P09  
P08  
P07  
P06  
P05  
P04  
P03  
P02  
P01  
0

STR, France

BU2, PER, Paris area

SLS, Paris

BU1, SLS, Paris

-50 0 50 100 150 200 250 300 350 400 450 500 550 600 650 700

Day of recovery

○ Not sequenced  
● Sequenced

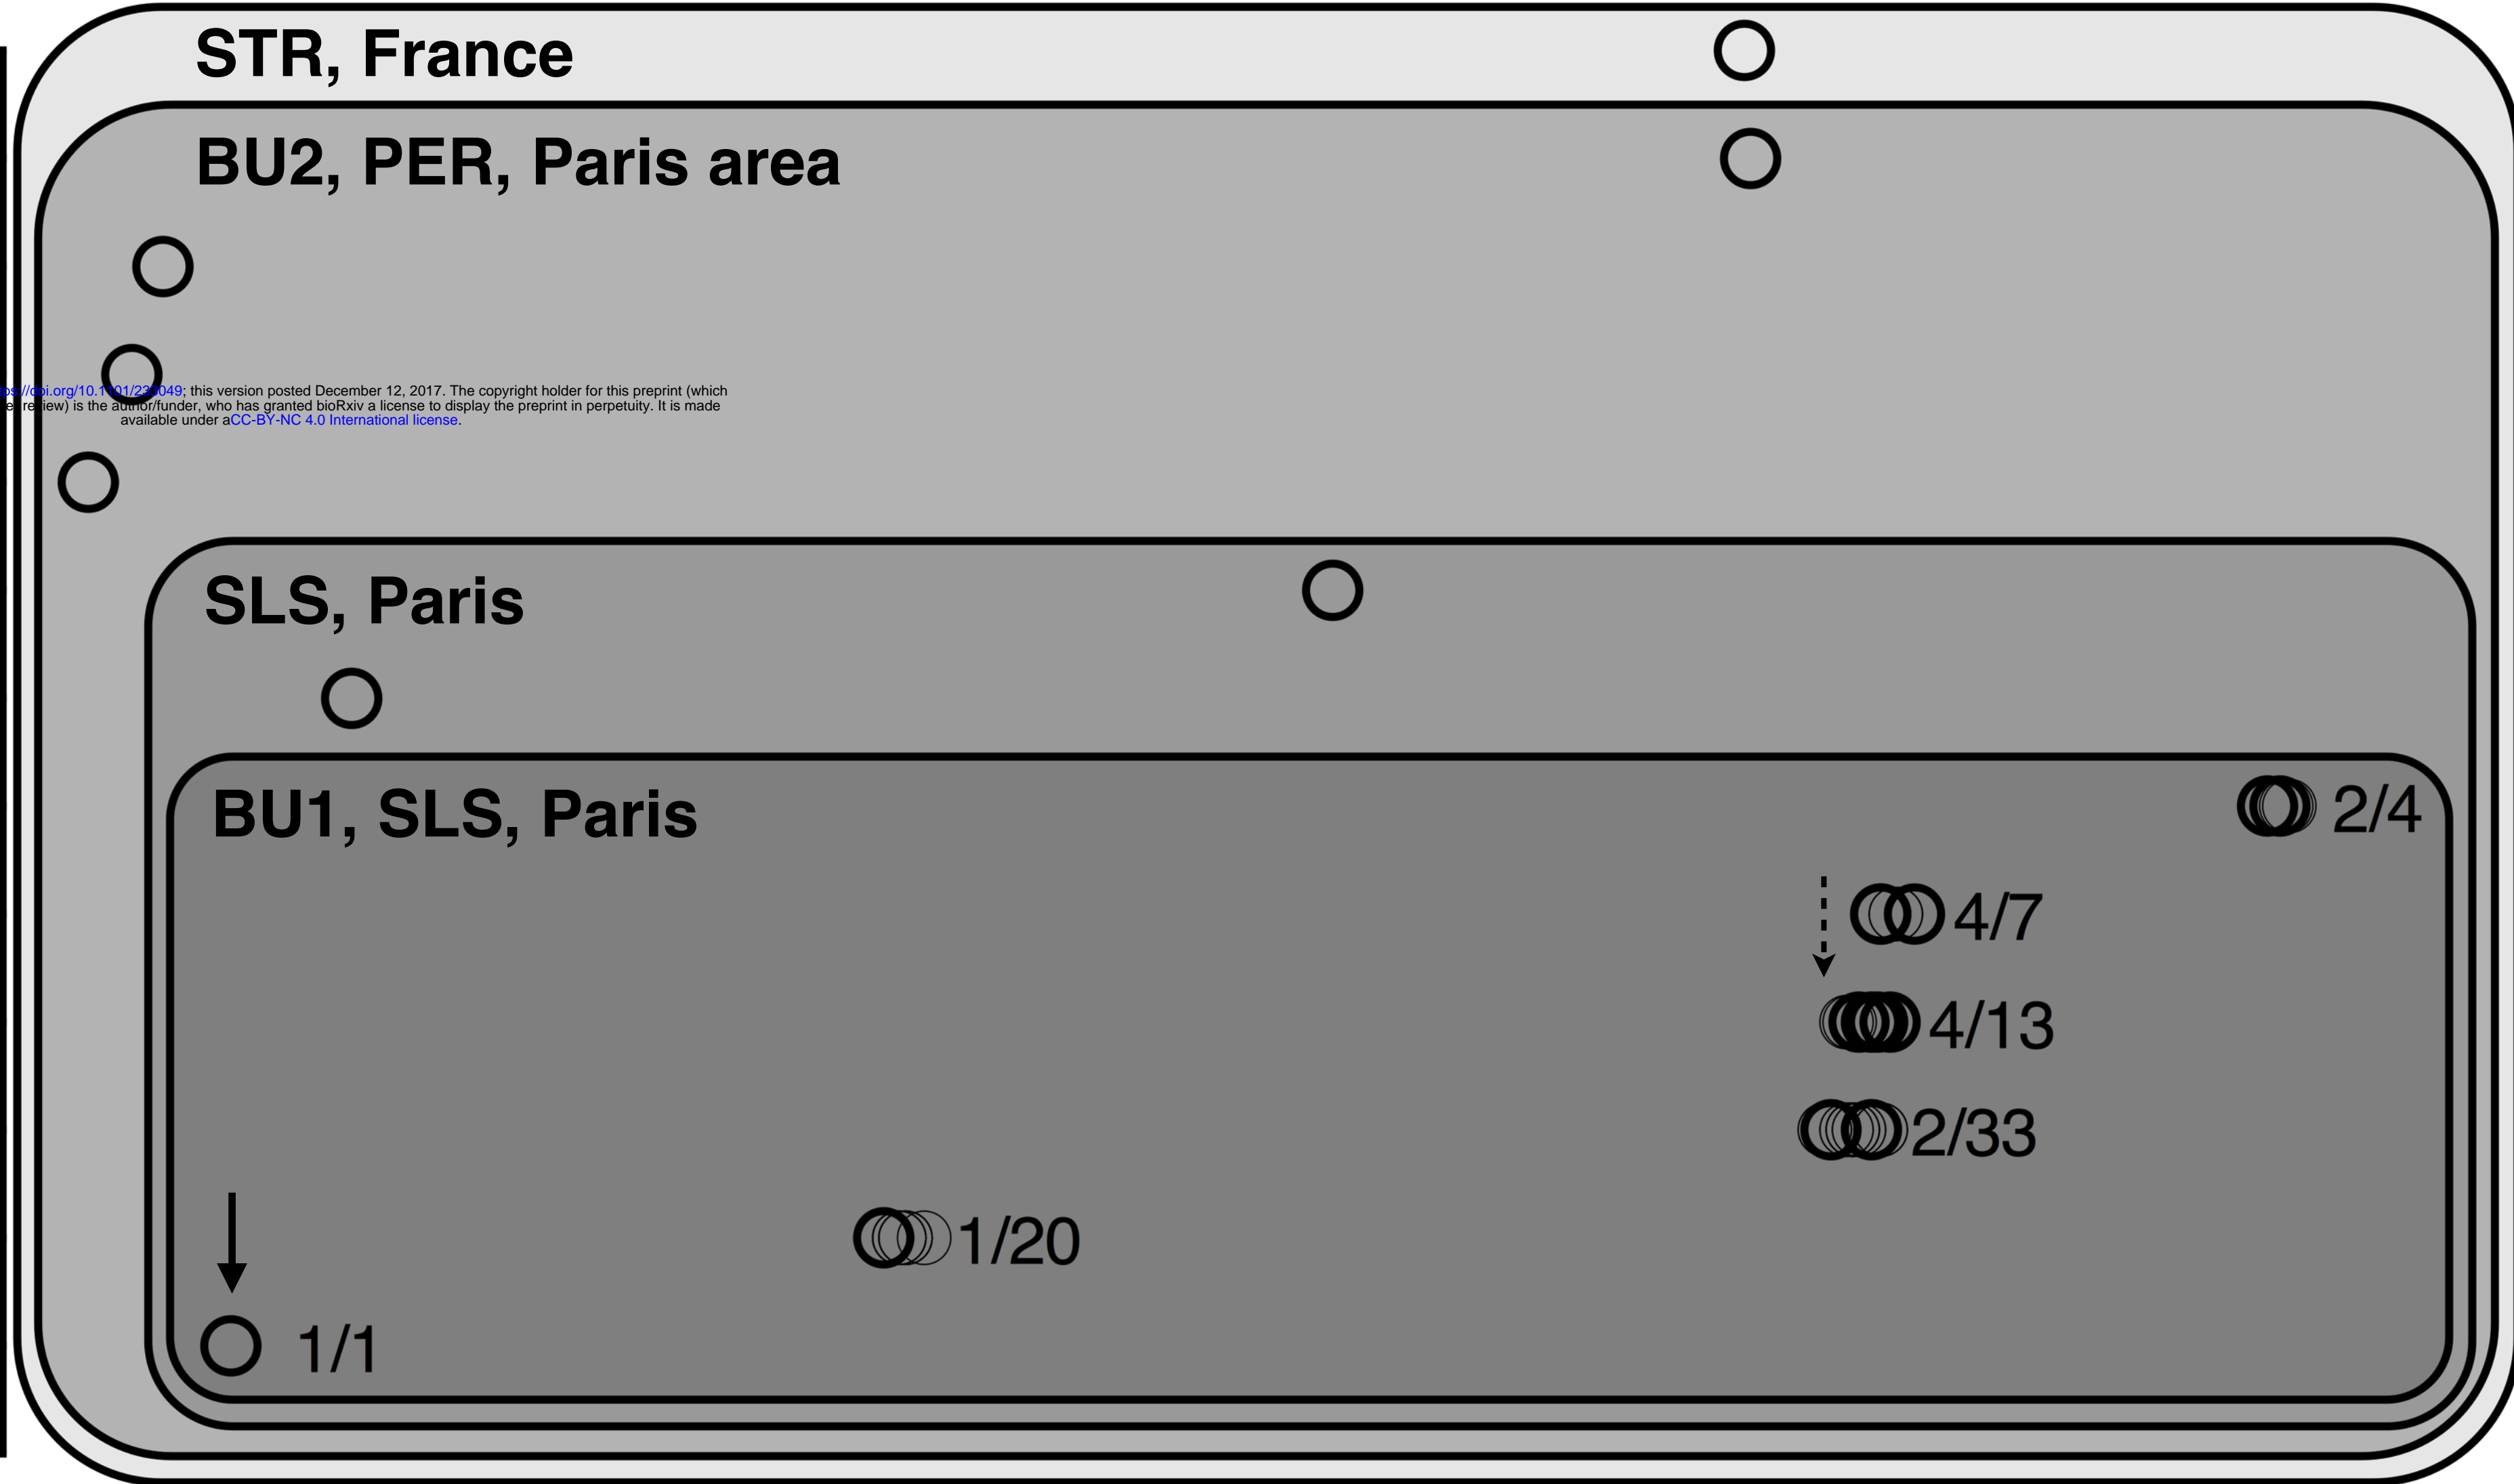

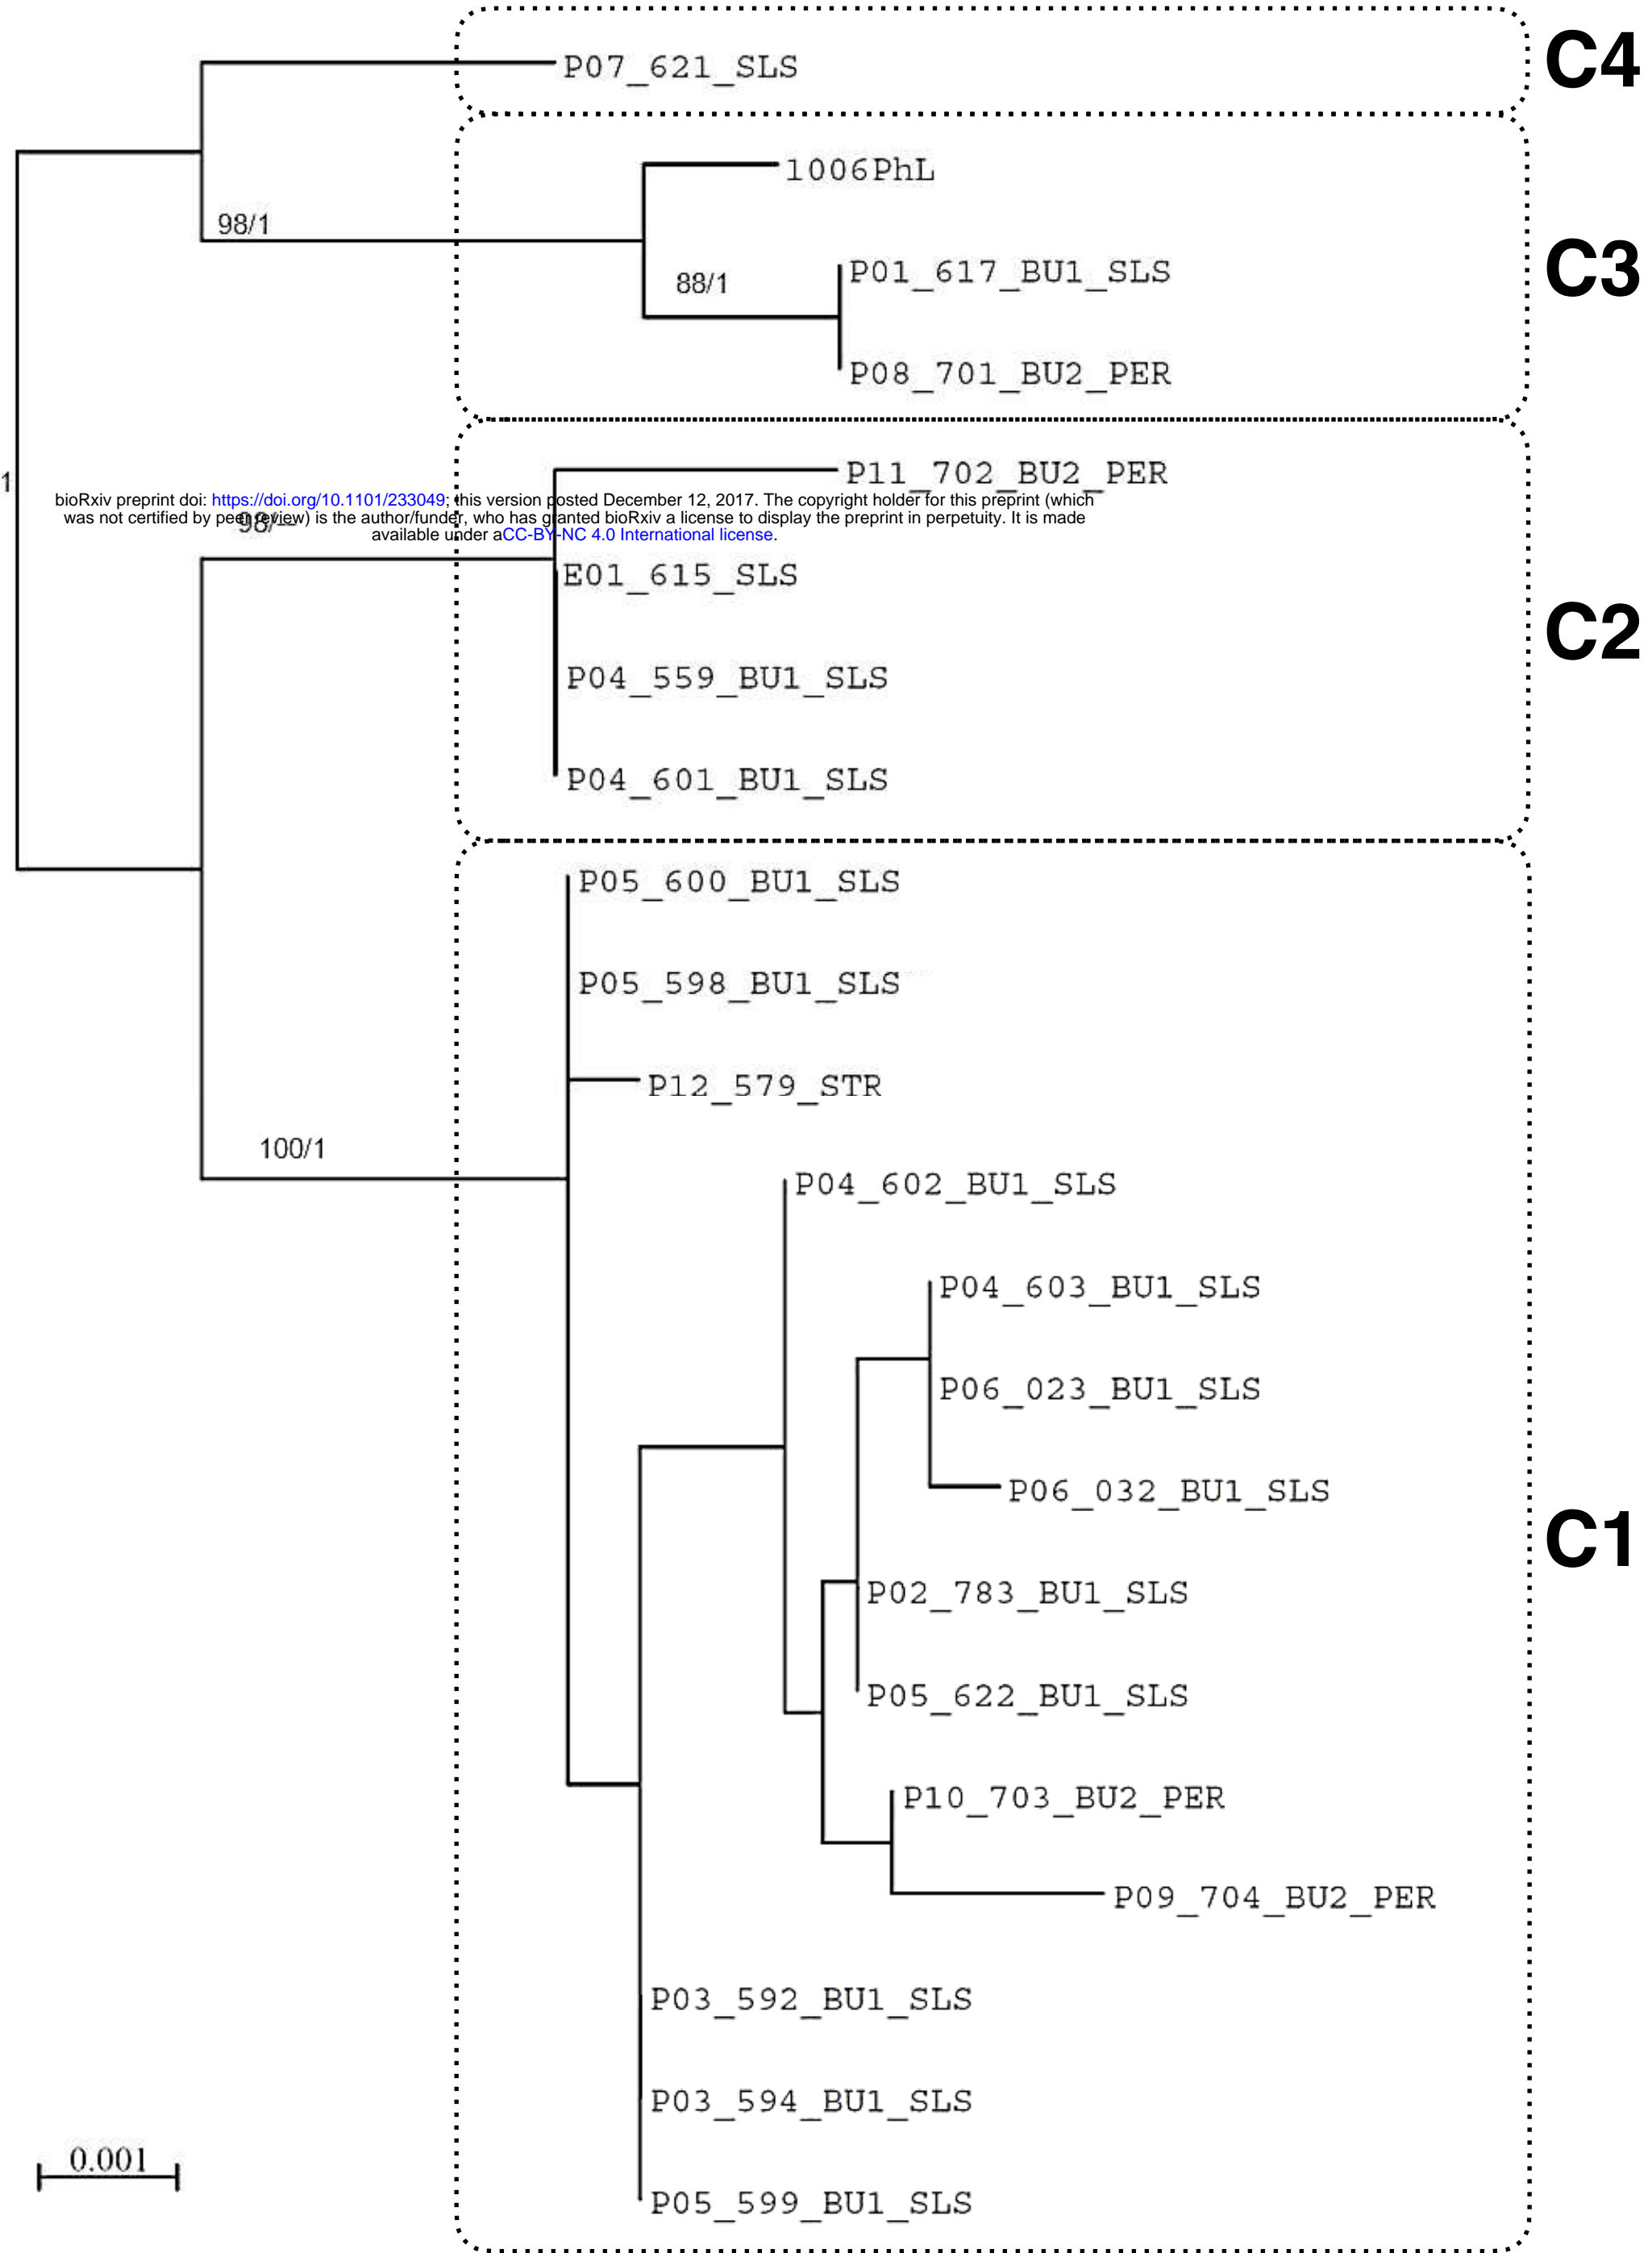

bioRxiv preprint doi: <https://doi.org/10.1101/233049>; this version posted December 12, 2017. The copyright holder for this preprint (which was not certified by peer review) is the author/funder, who has granted bioRxiv a license to display the preprint in perpetuity. It is made available under aCC-BY-NC 4.0 International license.

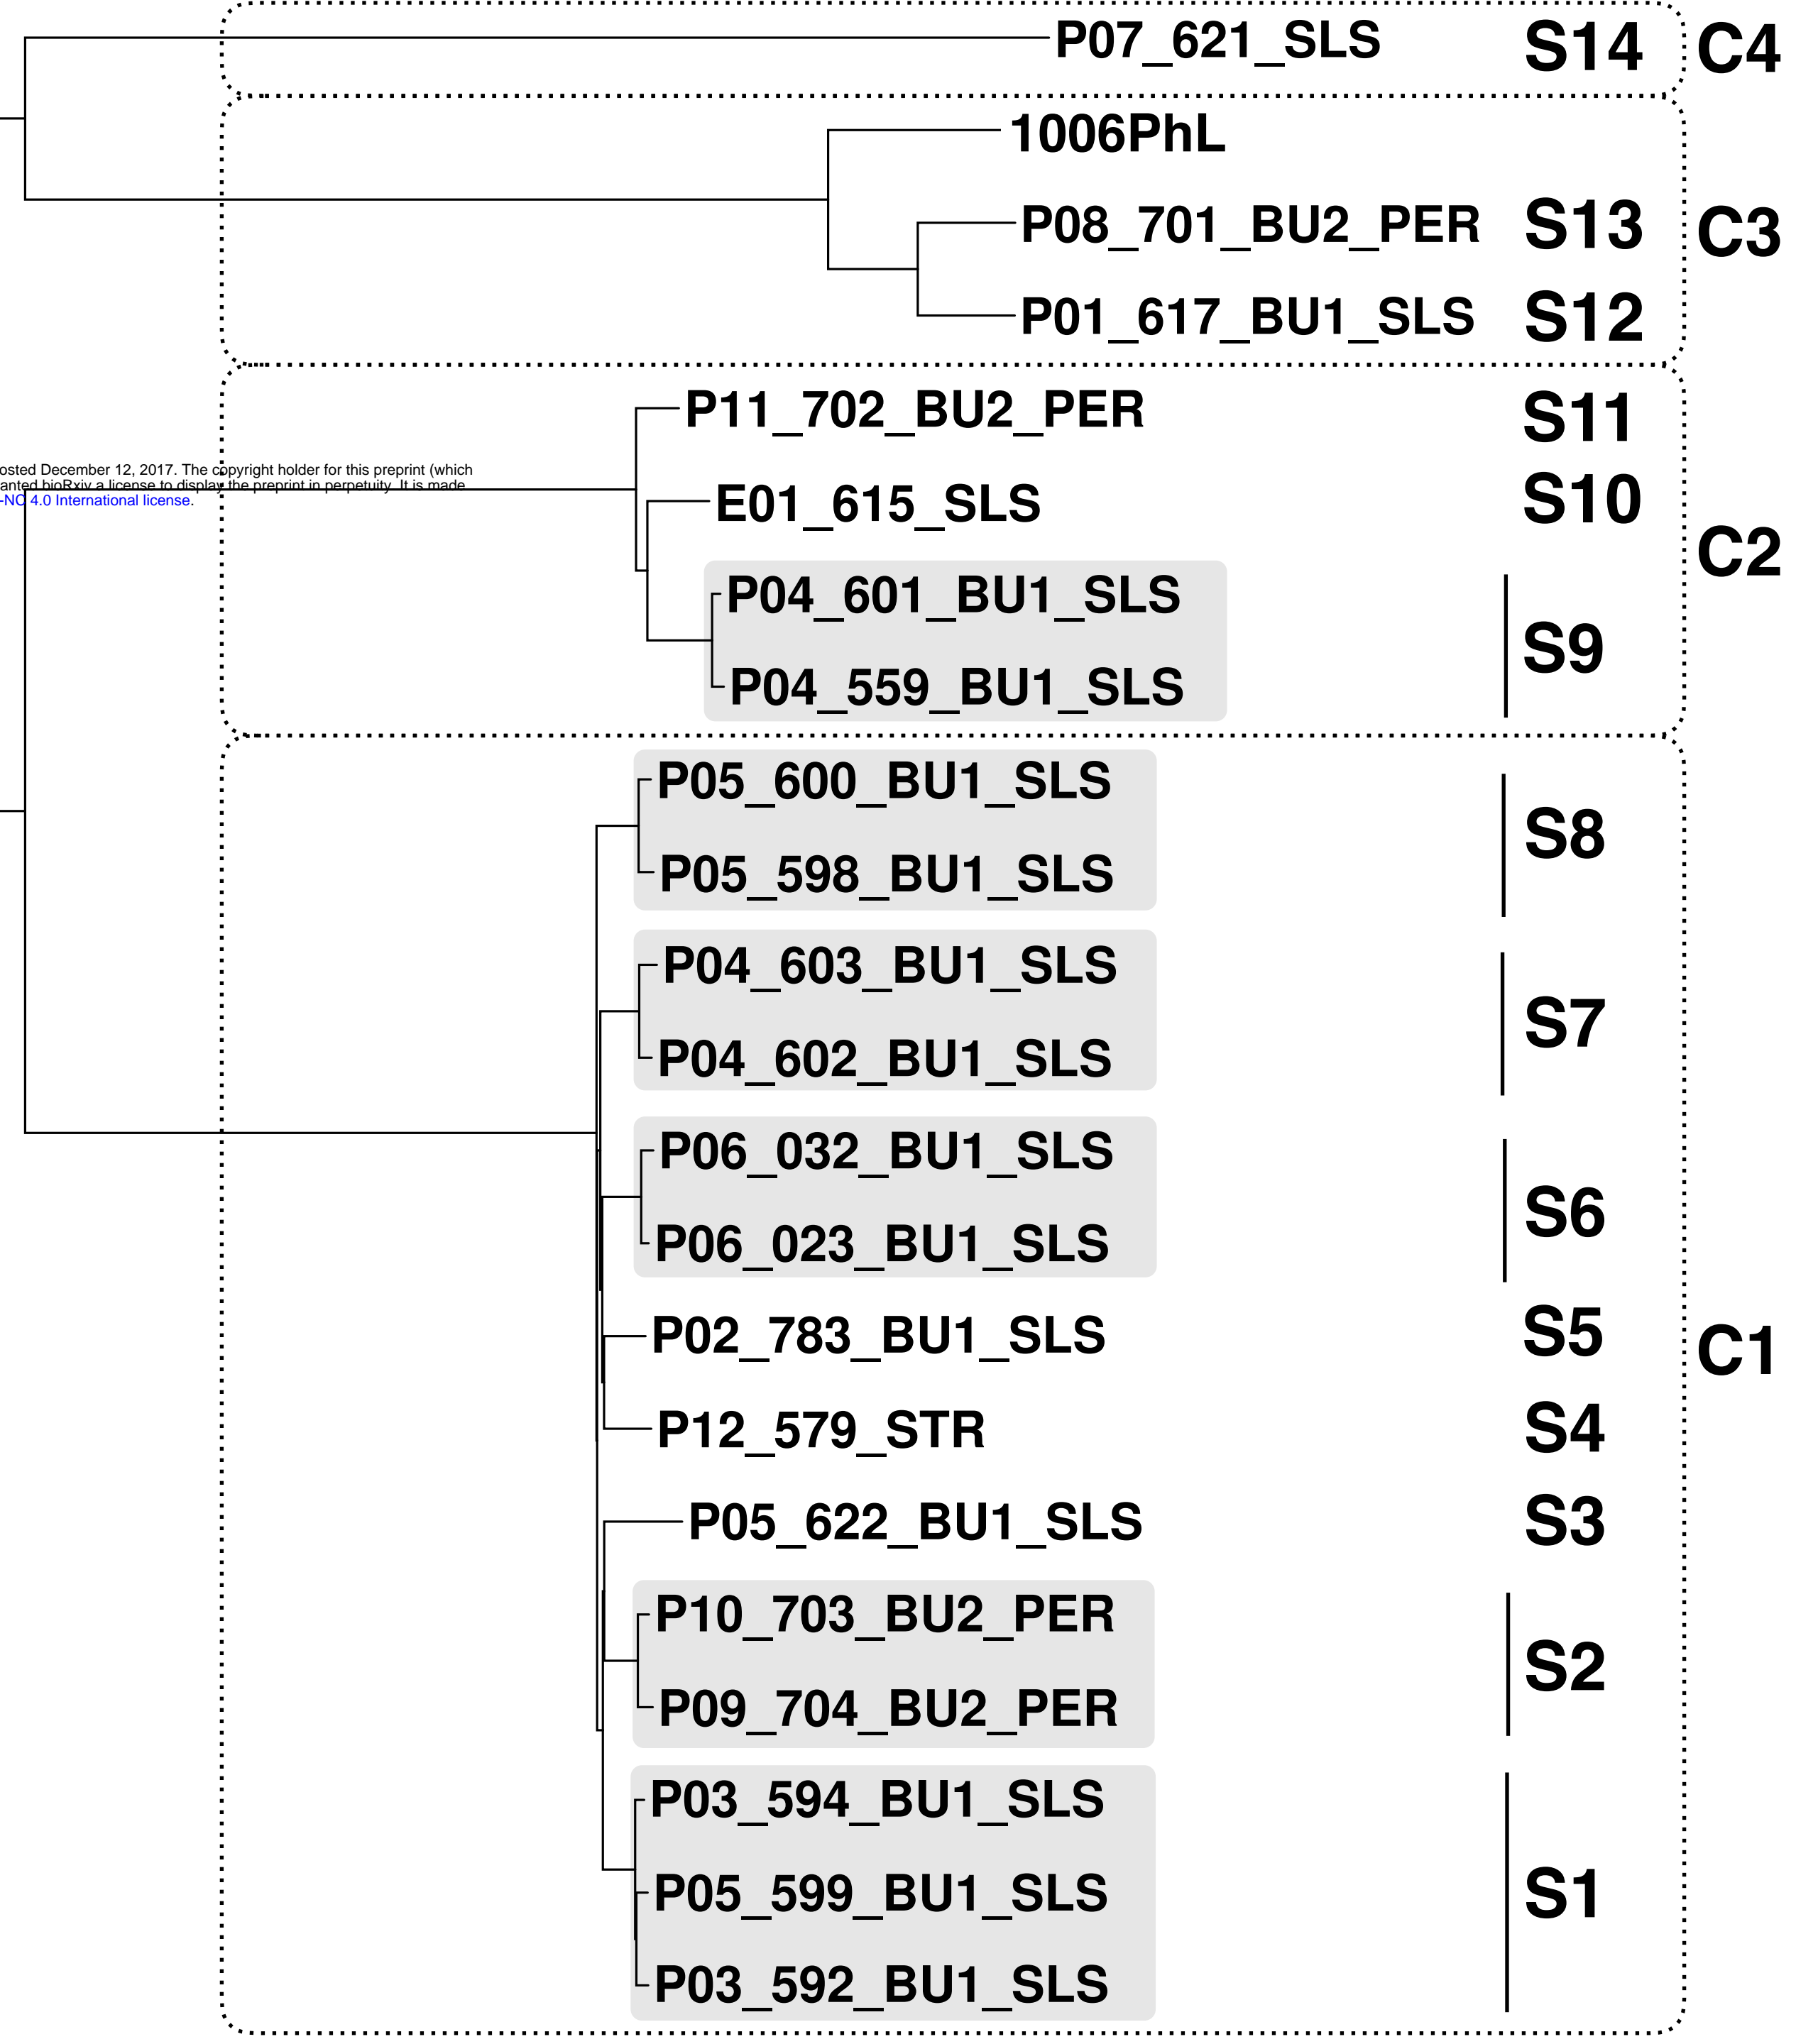

P07\_621\_SLS

S14

C4

1006PhL

P08\_701\_BU2\_PER

S13

C3

P01\_617\_BU1\_SLS

S12

P11\_702\_BU2\_PER

S11

E01\_615\_SLS

S10

C2

P04\_601\_BU1\_SLS

S9

P04\_559\_BU1\_SLS

P05\_600\_BU1\_SLS

S8

P05\_598\_BU1\_SLS

P04\_603\_BU1\_SLS

S7

P04\_602\_BU1\_SLS

P06\_032\_BU1\_SLS

S6

P06\_023\_BU1\_SLS

P02\_783\_BU1\_SLS

S5

C1

P12\_579\_STR

S4

P05\_622\_BU1\_SLS

S3

P10\_703\_BU2\_PER

S2

P09\_704\_BU2\_PER

P03\_594\_BU1\_SLS

P05\_599\_BU1\_SLS

S1

P03\_592\_BU1\_SLS

0.004

Table 1: Isolates sequenced in this study

| Isolate ID      | Date of recovery | Day from index isolate | Nature of the sample | Patient ID | Ward              | Hospital   | City                   | Site   | EORTC/MSG | Outcome | Cluster number | Strain number ** |
|-----------------|------------------|------------------------|----------------------|------------|-------------------|------------|------------------------|--------|-----------|---------|----------------|------------------|
| P01_617_BU1_SLS | 21/03/13         | 0                      | Wound                | P01        | Burn unit 1       | SLS        | Paris                  | Wound  | No        | Alive   | C3             | S12              |
| P02_783_BU1_SLS | 18/10/13         | 211                    | Bone                 | P02        |                   |            |                        | Wound  | Proven    | Death   | C1             | S1               |
| P03_592_BU1_SLS | 20/08/14         | 517                    | Wound (shoulder)     | P03        |                   |            |                        | Wound  | Proven    | Death   |                |                  |
| P03_594_BU1_SLS | 02/09/14         | 530                    | Wound (hand)         | P04        |                   |            |                        | Wound  | Proven    | Death   | C2             | S9               |
| P04_559_BU1_SLS | 29/08/14         | 526                    | Wound (hand)         |            |                   |            |                        |        |           |         |                |                  |
| P04_601_BU1_SLS | 02/09/14         | 530                    | Wound (shoulder)     |            |                   |            |                        |        |           |         |                |                  |
| P04_602_BU1_SLS | 04/09/14         | 532                    | Wound (forearm)      |            |                   |            |                        |        |           |         |                |                  |
| P04_603_BU1_SLS | 08/09/14         | 536                    | Wound (leg)          | P05        |                   |            |                        | Wound  | Proven    | Death   | C1             | S8               |
| P05_599_BU1_SLS | 05/09/14         | 533                    | Wound (arm 1)        |            |                   |            |                        |        |           |         |                |                  |
| P05_598_BU1_SLS | 05/09/14         | 533                    | Wound (thigh)        |            |                   |            |                        |        |           |         |                |                  |
| P05_600_BU1_SLS | 05/09/14         | 533                    | Wound (arm 2)        | P06        |                   |            |                        | Wound  | Proven    | Alive   | C1             | S3               |
| P05_622_BU1_SLS | 16/09/14         | 544                    | Wound (forearm)      |            |                   |            |                        |        |           |         |                |                  |
| P06_023_BU1_SLS | 08/01/15         | 658                    | Wound (leg)          | P06        |                   |            |                        | Wound  | Proven    | Alive   | C1             | S6               |
| P06_032_BU1_SLS | 12/01/15         | 662                    | Wound (knee)         |            |                   |            |                        |        |           |         |                |                  |
| P07_621_SLS     | 29/04/13         | 39                     | Sputum               | P07        | Pneumology        | Hematology | Lung                   | No     |           | C4      | S14            |                  |
| E01_615_SLS     | 12/03/14         | 356                    | Surface swab         | -          |                   |            | /                      |        |           | C2      | S10            |                  |
| P08_701_BU2_PER | 03/02/13         | -46                    | Wound                | P08        | Burn unit 2       | PER        | Clamart (Paris suburb) | Wound  | Proven    | Death   | C3             | S13              |
| P09_704_BU2_PER | 17/02/13         | -32                    | Wound                | P09        |                   |            |                        | Wound  | Proven    | Death   | C1             | S2               |
| P10_703_BU2_PER | 27/02/13         | -22                    | Wound                | P010       |                   |            |                        | Wound  | Proven    | Death   |                |                  |
| P11_702_BU2_PER | 25/07/14         | 491                    | Wound                | P011       |                   |            |                        | Wound  | Proven    | Death   | C2             | S11              |
| P12_579_STR     | 23/07/14         | 489                    | Kidney biopsy        | P012       | Kidney transplant | STR        | Strasbourg             | Kidney | Proven    | Death   | C1             | S4               |

\*\* based on strain relatedness after WGS analysis –
